# Supplementary material for: Assessing the impact of polio supplementary immunisation activities on routine immunisation and health systems: a systematic review
Source: PubMed Central journal article supplement — BMJ Glob Health. 2021 Nov 12;6(11):e006568. doi: 10.1136/bmjgh-2021-006568 (PMC8593720; doi:10.1136/bmjgh-2021-006568), 2021-11-12
Supplement: bmjgh-2021-006568supp001.pdf [file bmjgh-2021-006568supp001.pdf]

## Supplementary File 1

### Search Strategy

Database: MEDLINE(R) All including Epub Ahead of Print, In-Process & Other Non-Indexed Citations, Daily and Versions(R) <1946-current>

Search Strategy:

-----  
1 exp Poliomyelitis/  
2 exp Poliovirus/  
3 exp Poliovirus Vaccines/  
4 polio\$.tw.  
5 1 or 2 or 3 or 4  
6 exp Mass Vaccination/  
7 (mass adj2 campaign\$).tw.  
8 (outbreak\$ and (respons\$ or control\$ or manage\$ or react\$ or impact\$ or activit\$ or campaign\$ or program\$ or project\$)).tw.  
9 ((supplement\$ adj5 (immuni\$ or vaccin\$)) and (activit\$ or campaign\$ or program\$ or project\$)).tw.  
10 (('house to house' or 'mop up') adj2 (immuni\$ or vaccin\$)).tw.  
11 (nation\$ adj2 (immuni\$ or vaccin\$) adj2 day\$).tw.  
12 (global\$ adj2 polio\$ adj2 eradicat\$ adj2 initiat\$).tw.  
13 GPEI.tw.  
14 6 or 7 or 8 or 9 or 10 or 11 or 12 or 13  
15 5 and 14  
16 exp Immunization Programs/  
17 (immuni\$ or vaccin\$).tw.  
18 16 or 17  
19 (routine\$ or universal\$ or usual\$ or normal\$ or standard\$ or establish\$ or tradition\$ or everyday\$).tw.  
20 18 and 19  
21 (expand\$ adj2 program\$ adj1 (immuni\$ or vaccin\$)).tw.  
22 (nation\$ adj2 (immuni\$ or vaccin\$) adj2 (activit\$ or campaign\$ or program\$ or project\$)).tw.  
23 NIP.tw.  
24 21 or 22 or 23  
25 20 or 24  
26 5 and 25  
27 15 and 26  
28 limit 27 to yr="1994 - 2020"

**Supplementary Table 1: Summary of Polio Supplementary Immunisation Activities (SIA), 1994-2020**

| <b>First author,<br/>Publication year</b> | <b>Type of SIA</b>                                                       | <b>Number of<br/>vaccination<br/>rounds</b> | <b>SIA year</b> | <b>Cohort included<br/>(Age group)</b> | <b>Total Doses of<br/>polio vaccine<br/>distributed</b> | <b>Was routine<br/>immunisation<br/>conducted?</b> | <b>Were there reports<br/>of social mobilisation<br/>and community<br/>engagement?</b> |
|-------------------------------------------|--------------------------------------------------------------------------|---------------------------------------------|-----------------|----------------------------------------|---------------------------------------------------------|----------------------------------------------------|----------------------------------------------------------------------------------------|
| Bawa, 2018                                | Immunisation plus day for nomadic populations                            | 2                                           | 2016            | <5 years                               | 3879                                                    | Yes                                                | Yes                                                                                    |
| Bawa, 2019                                | Mobile vaccination for hard-to-reach communities                         | 1                                           | 2014-2015       | <5 years                               | 2 979 408                                               | Yes                                                | Yes                                                                                    |
| Bedford, 2017                             | National Integrated polio, measles and deworming campaign                | 1                                           | 2015            | <5 years                               | 693 622                                                 | Yes                                                | Yes                                                                                    |
| Bonu, 2003                                | Pulse polio immunisation campaign with annual national immunisation days | NS                                          | 1995-1998       | 12-35 months                           | NS                                                      | Yes                                                | No                                                                                     |
| Bonu, 2004                                | National immunisation days                                               | 2 to 8                                      | 1990-2001       | <5 years                               | NS                                                      | Yes                                                | No                                                                                     |
| Closser 2014                              | NS                                                                       | NS                                          | NS              | NS                                     | NS                                                      | Yes                                                | Yes                                                                                    |
| Helleringer, 2016                         | Nationwide oral polio vaccines SIA                                       | 3                                           | 2011            | <5 years                               | NS                                                      | No                                                 | No                                                                                     |

|                    |                                                        |    |           |              |           |     |     |
|--------------------|--------------------------------------------------------|----|-----------|--------------|-----------|-----|-----|
| Koop, 2011         | Extended programme on immunisation in the refugee camp | 3  | 1999      | <4 years     | NS        | Yes | Yes |
| Levin, 2002        | Polio SIAs through national immunisation days          | NS | 1993-1998 | 1-5 years    | NS        | No  | No  |
| Mangrio, 2008      | Polio national immunisation days                       | NA | NA        | NA           | NA        | Yes | NA  |
| Mello, 2010        | National immunisation days                             | 2  | 2007      | 19-35 months | NS        | Yes | Yes |
| Nsugba, 2018       | Polio Eradication Initiative                           | NA | NA        | NA           | NA        | No  | No  |
| Onyeka, 2014       | Polio SIA                                              | 3  | 2010      | 0-59 months  | 3 906 860 | Yes | Yes |
| Poy, 2016          | Integrated polio SIA                                   | NS | 1994-2011 | NS           | NS        | Yes | No  |
| Tafesse, 2017      | Polio SIA                                              | 15 | 2013-2015 | <5 years     | NS        | No  | No  |
| Van den Ent, 2017  | Polio Eradication Initiative                           | NA | NA        | NA           | NA        | Yes | Yes |
| Van Turenout, 2003 | Mass immunisation campaign                             | 2  | 1995-2000 | 12-23 months | NS        | Yes | No  |
| Verguet, 2013      | National immunisation days                             | NA | 2010      | <5 years     | NS        | Yes | No  |
| Wallace, 2017      | Measles, rubella and polio SIA                         | NS | 2012-2013 | NS           | NS        | Yes | Yes |

|             |                            |   |      |             |    |     |    |
|-------------|----------------------------|---|------|-------------|----|-----|----|
| Zuber, 2003 | National immunisation days | 2 | 1999 | 0-59 months | NS | Yes | No |
|-------------|----------------------------|---|------|-------------|----|-----|----|

SIA = Supplementary Immunisation Activity; NS= Not stated; WPV = Wild Poliovirus; NA = Not applicable

**Supplementary Table 2: Summary of Immunisation Coverage from Polio Supplementary Immunisation Activities (SIA), 1994-2020**

| First author, Publication year | Polio coverage achieved following/ attributed to SIA +                                                                                                | Routine polio coverage <sup>+</sup>                                                                                                  | Immunisation coverage <sup>+</sup> – routine vaccines                                                                                            |
|--------------------------------|-------------------------------------------------------------------------------------------------------------------------------------------------------|--------------------------------------------------------------------------------------------------------------------------------------|--------------------------------------------------------------------------------------------------------------------------------------------------|
| Bawa 2018<br>WHO AFRO          | Feb 2016<br>2428 target popn, 2015 immunised = 83%*<br>March 2016<br>2036 target popn, 1864 immunised = 92%*                                          | Feb 2016<br>13.1% oral polio vaccines delivered were first dose<br>March 2016<br>12.6% oral polio vaccines delivered were first dose | Pentavalent n=296 100% coverage<br>Measles N=330 111% coverage<br>Vitamin A N=311 105% coverage                                                  |
| Bawa 2019<br>WHO AFRO          | 2979408 OPV doses delivered for children <5 years<br>Crude coverage in selected clusters: 3178/3872 (82.1%)<br>Increased to 3408/3575 (95.3%)         |                                                                                                                                      | Crude coverage for routine immunisation (measles proxy in immunisation card) in selected clusters: 690/3872 (17.8%) increased to 1750/3575 (49%) |
| Bedford 2017<br>WHO AFRO       | 101%                                                                                                                                                  |                                                                                                                                      | Measles 99% Deworming 99% (during campaign)                                                                                                      |
| Bonu 2003<br>WHO SEARO         | Increased from 48.1% to 72.6% f (p<0.000) in selected states for OPV1<br>Increased from 34% to 45% for OPV3 (demonstrating significant drop-out rate) | 48% first dose<br>34% 3 doses                                                                                                        | DPT 1 dose pre = 48%<br>DPT 1 dose post = 49.9%<br>DPT 3 dose pre = 31.2%<br>DPT 3 dose post = 29.1%                                             |

|                                       |                                                                                                                                            |                      |                                                                                                                                           |
|---------------------------------------|--------------------------------------------------------------------------------------------------------------------------------------------|----------------------|-------------------------------------------------------------------------------------------------------------------------------------------|
|                                       | 3 times increase in 1 dose OPV coverage after controlling for survey design and demographics.                                              |                      |                                                                                                                                           |
| Bonu, 2004<br>WHO AFRO<br>WHO SEARO   | Difference in immunisation pre and post intervention (polio 3)<br>WHO AFRO – Ranged from -17.3 – 9.2<br>WHO SEARO – Ranged from 6.2 – 40.2 |                      | Difference in immunisation pre and post intervention (EPI 5)<br>WHO AFRO – Ranged from -11.3 – 14.8<br>WHO SEARO – Ranged from 1.5 – 20.2 |
| Closser 2014<br>WHO AFRO<br>WHO SEARO |                                                                                                                                            |                      | DTP3 coverage ranges by region from 32-93%                                                                                                |
| Helleringer, 2016<br>WHO SEARO        | 66.5%                                                                                                                                      |                      | SIA exposure on DTP doses was significant                                                                                                 |
| Koop, 2001<br>WHO EURO                | 70-100% of children depending on day and camp                                                                                              |                      | 70-100% of children depending on day and camp                                                                                             |
| Mello, 2010<br>PAHO/ WHO              | 91%                                                                                                                                        |                      | HepB: 2.5-4.8%<br>MMR: 4.0-6%<br>DPT-Hib or DTP: 6.9-11.4%<br>(coverage varies by state)                                                  |
| Onyeka, 2014<br>WHO AFRO              | Jan: 127%<br>Mar: 135%<br>Nov: 131%                                                                                                        | Jan: 21%<br>Dec: 74% |                                                                                                                                           |
| Poy, 2016<br>WHO AFRO                 | Cameroon: 104.4%                                                                                                                           |                      | Measles: 101%                                                                                                                             |

|                                |                                                                                                          |                                                              |                                                                                                                                              |
|--------------------------------|----------------------------------------------------------------------------------------------------------|--------------------------------------------------------------|----------------------------------------------------------------------------------------------------------------------------------------------|
|                                | DR Congo: 104.5%                                                                                         |                                                              |                                                                                                                                              |
| Tafesse, 2017<br>WHO AFRO      | 97.8% (average over 15 rounds)                                                                           |                                                              |                                                                                                                                              |
| van Turenout, 2003<br>WHO AFRO | Round 1: 57%<br>Round 2: 80%                                                                             | Polio 0 - 96<br>Polio 1 - 98<br>Polio 2 - 97<br>Polio 3 - 92 | 79% of children were fully immunised through routine services<br>(Measles 85%, Hib <10%, all others >91%)                                    |
| Zuber, 2003<br>WHO AFRO        | ADMIN METHOD:<br>Round 1 - 103%<br>Round 2 - 108%<br><br>SURVEY METHOD<br>Round 1 - 88%<br>Round 2 - 91% |                                                              | ADMIN METHOD:<br>Round 1 (vit A) - 100%<br>Round 2 (measles) - 113%<br><br>SURVEY METHOD<br>Round 1 (vit A) - 90%<br>Round 2 (measles) - 89% |

\* coverage calculated using numerator and denominator provided in study

+ immunisation coverage data presented as background or context, and not explicitly part of the study design, was not included
